# Supplementary material
Source: PubMed Central journal article supplement (PMC2930029)
Supplement: NIHMS225018-supplement-02.pdf [file NIHMS225018-supplement-02.pdf]

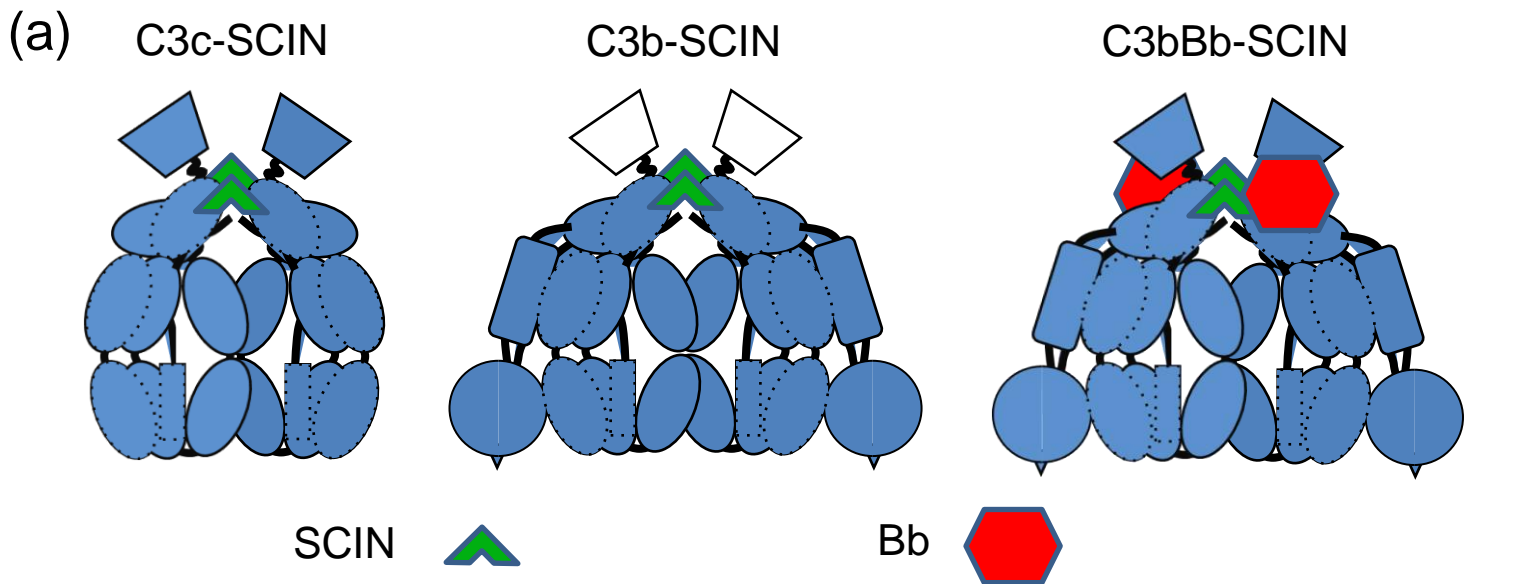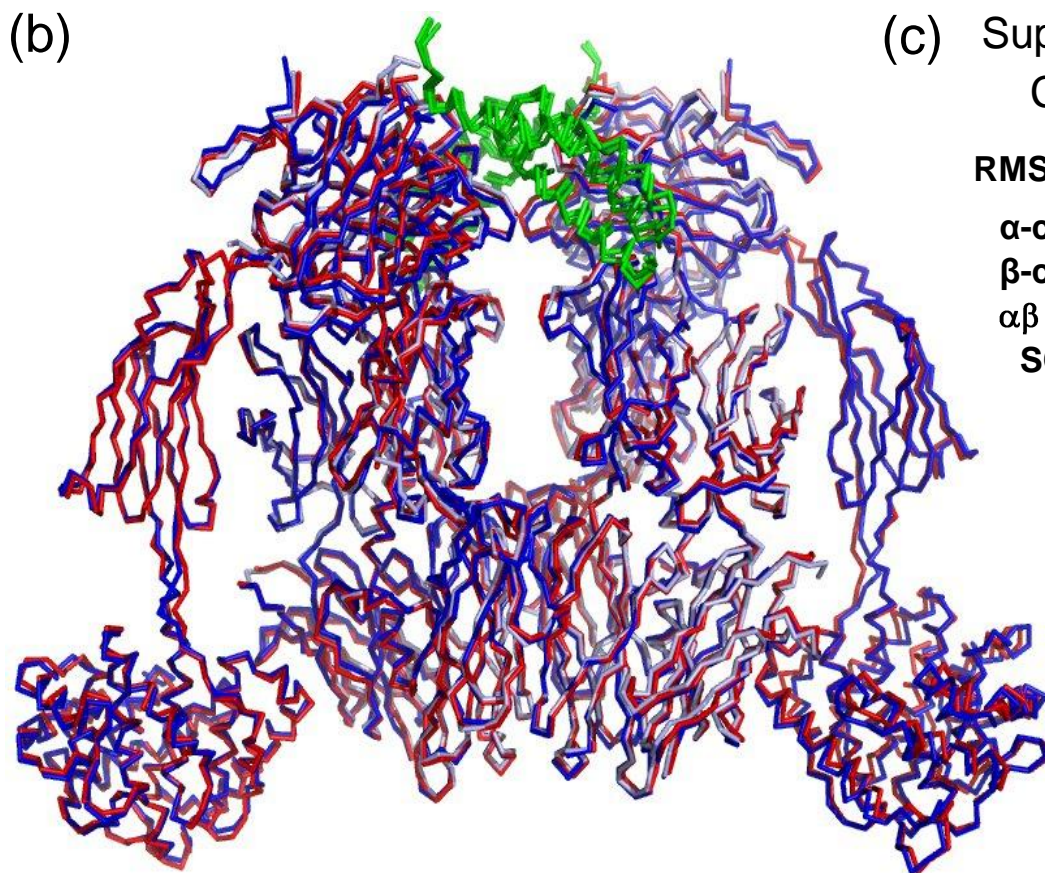

(c) Superposition RMSD onto C3bBb-SCIN (2WIN)

| RMSD (Å)       | C3c-SCIN | C3b-SCIN |
|----------------|----------|----------|
| <b>α-chain</b> | 0.70     | 1.07     |
| <b>β-chain</b> | 0.62     | 0.75     |
| <b>αβ both</b> | 0.65     | 0.80     |
| <b>SCIN</b>    | 0.37     | 0.29     |
