# Supplementary material
Source: PubMed Central journal article supplement (PMC2930029)

Garcia et al., Figure S1

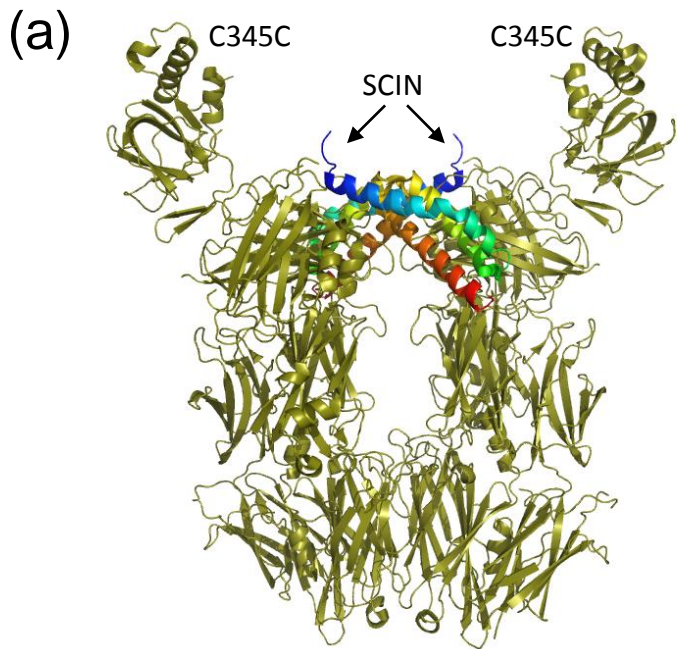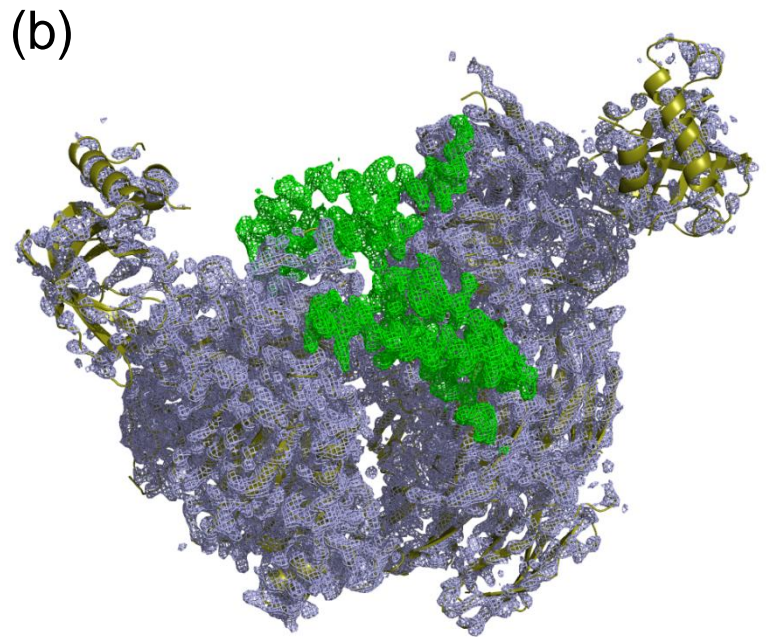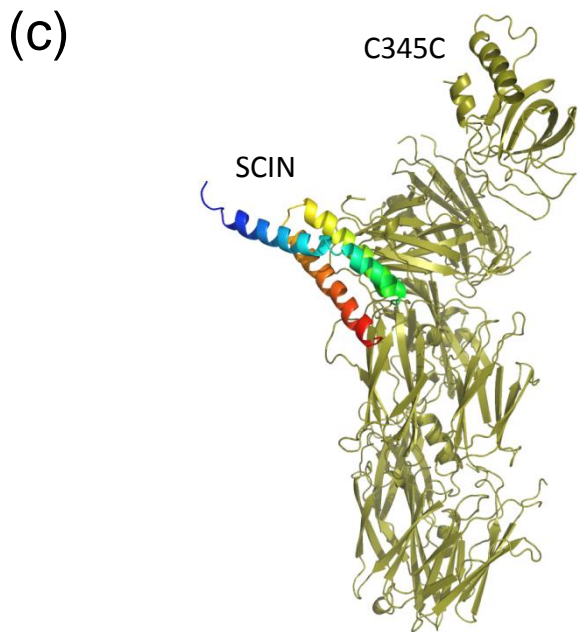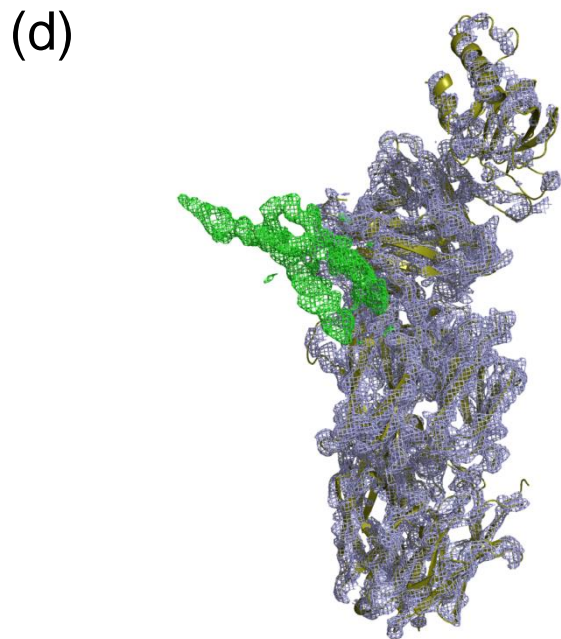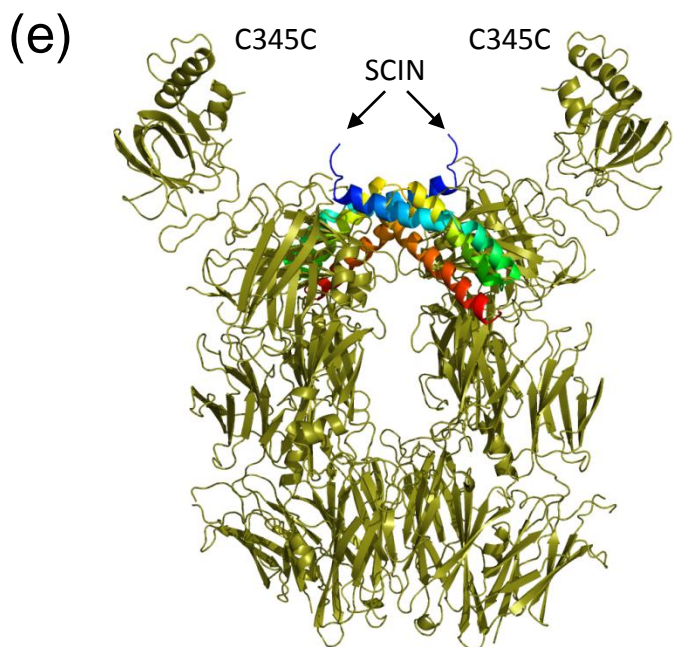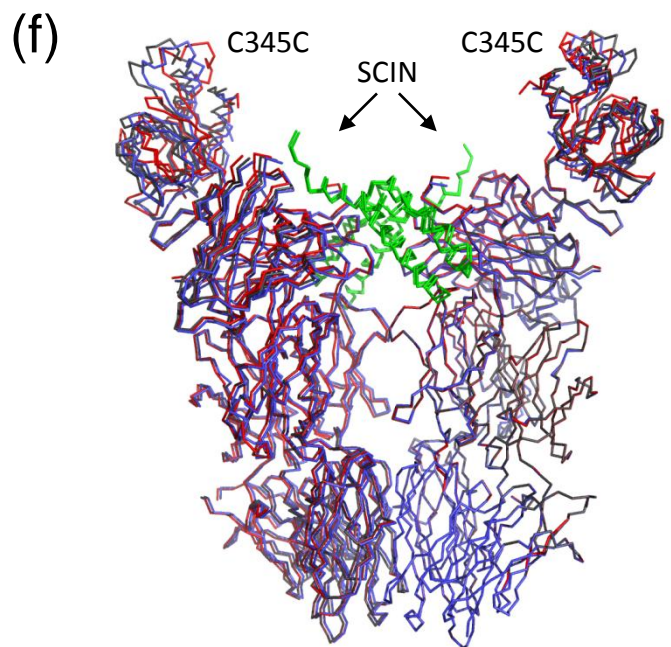

Supplement: NIHMS225018-supplement-01.pdf [file NIHMS225018-supplement-01.pdf]

(a)

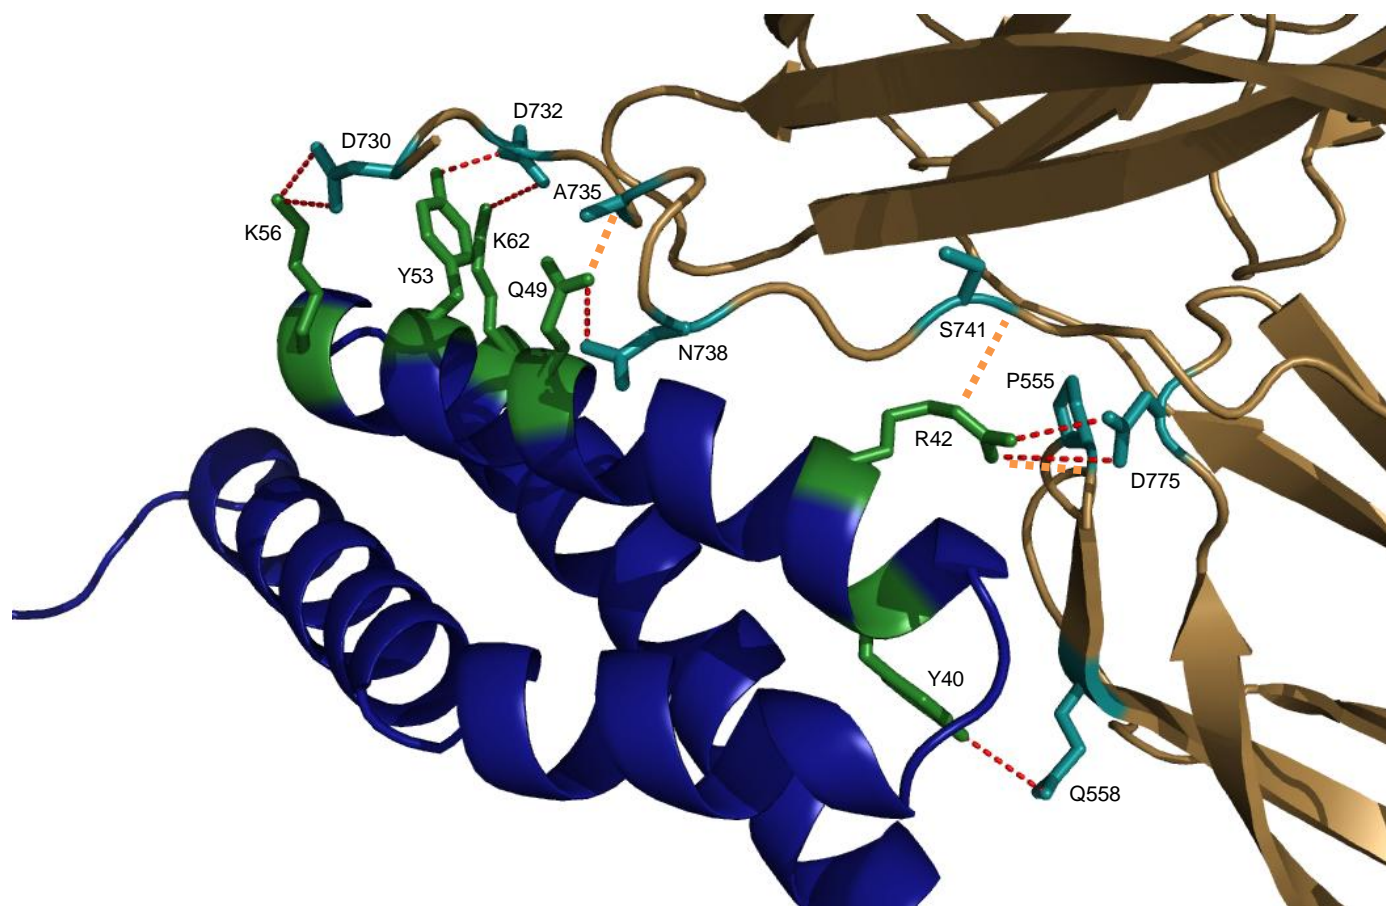

(b)

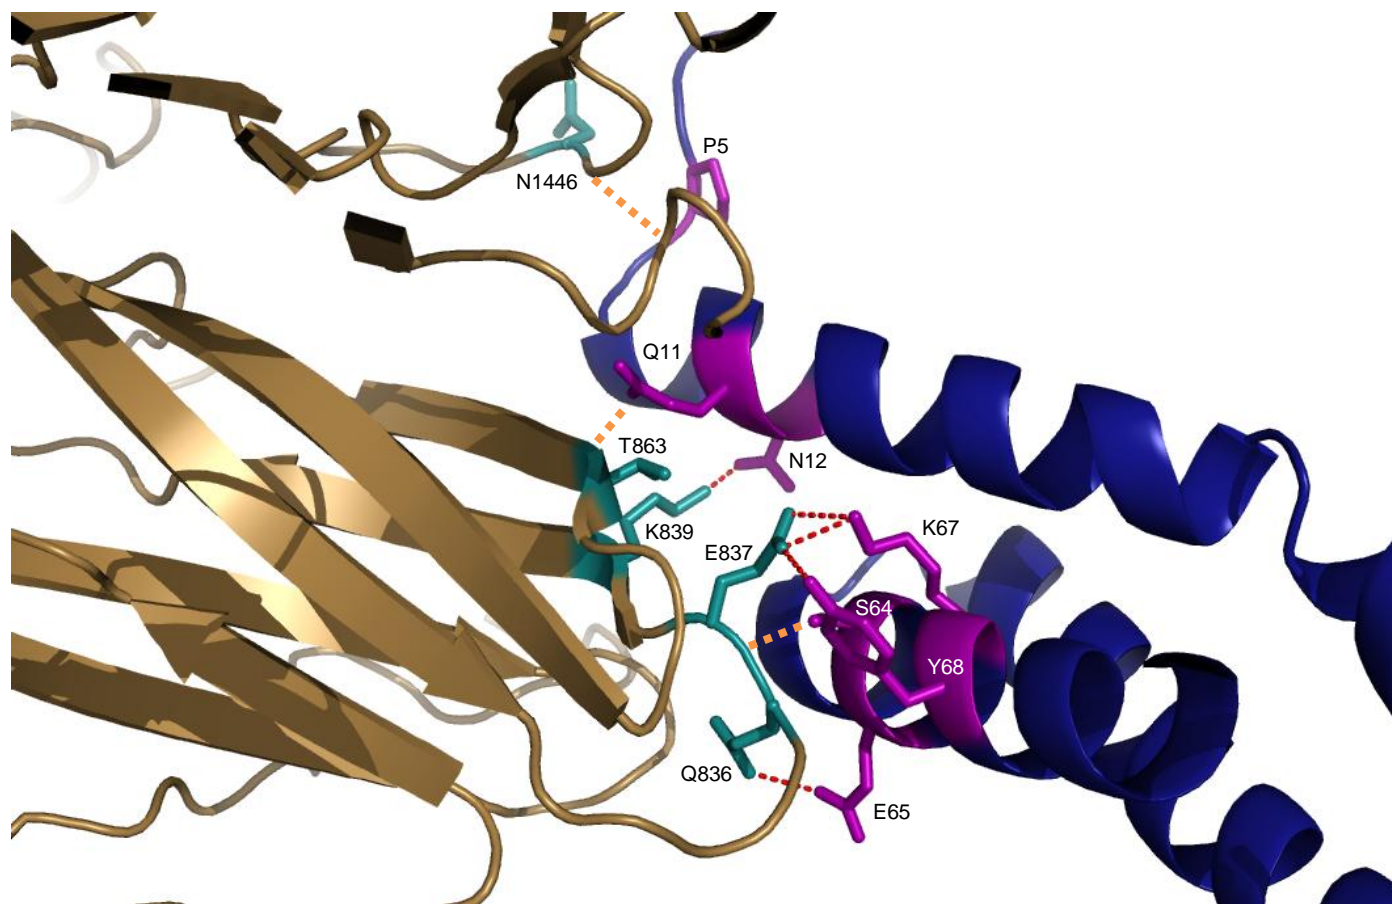

Supplement: NIHMS225018-supplement-03.pdf [file NIHMS225018-supplement-03.pdf]
